# Supplementary material
Source: MDPI journal article supplement (https://www.mdpi.com/1996-1073/16/4/1708)
Supplement: s1 [file s1]

Table S1: Results for Case 1 in Scenario 1: (a) Period 1, (b) Period 2, (c) Period 3, (d) Period 4, (e) Period 5 and (f) Period 6

|          | Fuel    | Gross Energy (TWh/y) | CO <sub>2</sub> Intensity (Mt/TWh) | Net Energy (TWh/y) | CO <sub>2</sub> Load (Mt/y) | Total Cost (mil USD/y) |
|----------|---------|----------------------|------------------------------------|--------------------|-----------------------------|------------------------|
| Plant_1  | SOLAR   | 20.02                | 0.15                               | 20.02              | 3                           |                        |
| Plant_2  | SOLAR   | 0                    | 0.15                               | 0                  | 0                           |                        |
| Plant_3  | NG      | 15.33                | 0.5                                | 15.33              | 7.67                        |                        |
| Plant_4  | NG      | 0                    | 0.5                                | 0                  | 0                           |                        |
| Plant_5  | NG      | 0                    | 0.5                                | 0                  | 0                           |                        |
| Plant_6  | OIL     | 0                    | 0.8                                | 0                  | 0                           |                        |
| Plant_7  | COAL    | 6.67                 | 1                                  | 6.67               | 6.67                        |                        |
| Plant_8  | COAL    | 17.97                | 1                                  | 17.97              | 17.97                       |                        |
| Plant_9  | SOLAR   | 0                    | 0.15                               | 0                  | 0                           |                        |
| Plant_10 | SOLAR   | 0                    | 0.15                               | 0                  | 0                           |                        |
| SOLAR    | SOLAR   |                      | 0.1                                | 0                  | 0                           |                        |
| HYDRO    | HYDRO   |                      | 0.15                               | 0                  | 0                           |                        |
| BIOMASS  | BIOMASS |                      | 0.3                                | 0                  | 0                           |                        |
| BIOGAS   | BIOGAS  |                      | 0.25                               | 0                  | 0                           |                        |
| TOTAL    |         |                      |                                    |                    | 35.31                       | 3000                   |

(a)

|          | Fuel    | Gross Energy<br>(TWh/y) | CO <sub>2</sub> Intensity<br>(Mt/TWh) | Net Energy<br>(TWh/y) | CO <sub>2</sub> Load (Mt/y) | Total Cost (mil<br>USD/y) |
|----------|---------|-------------------------|---------------------------------------|-----------------------|-----------------------------|---------------------------|
| Plant_1  | SOLAR   | 26.7                    | 0.15                                  | 26.7                  | 4                           |                           |
| Plant_2  | SOLAR   | 0                       | 0.15                                  | 0                     | 0                           |                           |
| Plant_3  | NG      | 19.69                   | 0.5                                   | 19.69                 | 9.85                        |                           |
| Plant_4  | NG      | 0                       | 0.5                                   | 0                     | 0                           |                           |
| Plant_5  | NG      | 0                       | 0.5                                   | 0                     | 0                           |                           |
| Plant_6  | OIL     | 0                       | 0.8                                   | 0                     | 0                           |                           |
| Plant_7  | COAL    | 10.51                   | 1                                     | 10.51                 | 10.51                       |                           |
| Plant_8  | COAL    | 18.1                    | 1                                     | 18.1                  | 18.1                        |                           |
| Plant_9  | SOLAR   | 0                       | 0.15                                  | 0                     | 0                           |                           |
| Plant_10 | SOLAR   | 0                       | 0.15                                  | 0                     | 0                           |                           |
| SOLAR    | SOLAR   |                         | 0.09                                  | 0                     | 0                           |                           |
| HYDRO    | HYDRO   |                         | 0.14                                  | 0                     | 0                           |                           |
| BIOMASS  | BIOMASS |                         | 0.28                                  | 0                     | 0                           |                           |
| BIOGAS   | BIOGAS  |                         | 0.23                                  | 0                     | 0                           |                           |
| TOTAL    |         |                         |                                       |                       | 42.46                       | 3500                      |

(b)

|          | Fuel    | Gross Energy<br>(TWh/y) | CO <sub>2</sub> Intensity<br>(Mt/TWh) | SOLID_2<br>(TWh/y) | GAS_2<br>(TWh/y) | Net Energy<br>(TWh/y) | CO <sub>2</sub> Load<br>(Mt/y) | Total Cost<br>(mil USD/y) |
|----------|---------|-------------------------|---------------------------------------|--------------------|------------------|-----------------------|--------------------------------|---------------------------|
| Plant_1  | SOLAR   | 26.7                    | 0.15                                  | 0                  | 0                | 26.7                  | 4                              |                           |
| Plant_2  | SOLAR   | 0                       | 0.15                                  | 0                  | 0                | 0                     | 0                              |                           |
| Plant_3  | NG      | 19.69                   | 0.5                                   | 0                  | 14               | 19.69                 | 5.79                           |                           |
| Plant_4  | NG      | 0                       | 0.5                                   | 0                  | 0                | 0                     | 0                              |                           |
| Plant_5  | NG      | 0                       | 0.5                                   | 0                  | 0                | 0                     | 0                              |                           |
| Plant_6  | OIL     | 0                       | 0.8                                   | 0                  | 0                | 0                     | 0                              |                           |
| Plant_7  | COAL    | 10.51                   | 1                                     | 0                  | 0                | 10.51                 | 10.51                          |                           |
| Plant_8  | COAL    | 18.1                    | 1                                     | 18.1               | 0                | 18.1                  | 6.52                           |                           |
| Plant_9  | SOLAR   | 15                      | 0.15                                  | 0                  | 0                | 15                    | 2.25                           |                           |
| Plant_10 | SOLAR   | 0                       | 0.15                                  | 0                  | 0                | 0                     | 0                              |                           |
| SOLAR    | SOLAR   |                         | 0.08                                  |                    |                  | 0                     | 0                              |                           |
| HYDRO    | HYDRO   |                         | 0.13                                  |                    |                  | 0                     | 0                              |                           |
| BIOMASS  | BIOMASS |                         | 0.26                                  |                    |                  | 0                     | 0                              |                           |
| BIOGAS   | BIOGAS  |                         | 0.21                                  |                    |                  | 0                     | 0                              |                           |
| TOTAL    |         |                         |                                       |                    |                  |                       | 29.06                          | 4000                      |

(c)

|          | Fuel    | Gross Energy (TWh/y) | CO <sub>2</sub> Intensity (Mt/TWh) | CCS_2 Ret (TWh/y) | SOLID_2 (TWh/y) | GAS_2 (TWh/y) | Net Energy (TWh/y) | CO <sub>2</sub> Load (Mt/y) | Total Cost (mil USD/y) |
|----------|---------|----------------------|------------------------------------|-------------------|-----------------|---------------|--------------------|-----------------------------|------------------------|
| Plant_1  | SOLAR   | 26.7                 | 0.15                               | 0                 | 0               | 0             | 26.7               | 4                           |                        |
| Plant_2  | SOLAR   | 0                    | 0.15                               | 0                 | 0               | 0             | 0                  | 0                           |                        |
| Plant_3  | NG      | 19.75                | 0.5                                | 5.75              | 0               | 14            | 18.49              | 3.58                        |                        |
| Plant_4  | NG      | 0                    | 0.5                                | 0                 | 0               | 0             | 0                  | 0                           |                        |
| Plant_5  | NG      | 9.94                 | 0.5                                | 9.94              | 0               | 0             | 7.75               | 1.59                        |                        |
| Plant_6  | OIL     | 0                    | 0.8                                | 0                 | 0               | 0             | 0                  | 0                           |                        |
| Plant_7  | COAL    | 10.51                | 1                                  | 0                 | 0               | 0             | 10.51              | 10.51                       |                        |
| Plant_8  | COAL    | 18.1                 | 1                                  | 0                 | 18.1            | 0             | 18.1               | 6.15                        |                        |
| Plant_9  | SOLAR   | 20                   | 0.15                               | 0                 | 0               | 0             | 20                 | 3                           |                        |
| Plant_10 | SOLAR   | 0                    | 0.15                               | 0                 | 0               | 0             | 0                  | 0                           |                        |
| SOLAR    | SOLAR   |                      | 0.07                               |                   |                 |               | 3.45               | 0.24                        |                        |
| HYDRO    | HYDRO   |                      | 0.12                               |                   |                 |               | 0                  | 0                           |                        |
| BIOMASS  | BIOMASS |                      | 0.24                               |                   |                 |               | 0                  | 0                           |                        |
| BIOGAS   | BIOGAS  |                      | 0.19                               |                   |                 |               | 0                  | 0                           |                        |
| MSW      | MSW     |                      | 0.27                               |                   |                 |               | 0                  | 0                           |                        |
| TOTAL    |         |                      |                                    |                   |                 |               |                    | 29.08                       | 4487.19                |

(d)

| Fuel    | Gross Energy<br>(TWh/y) | CO <sub>2</sub> Intensity<br>(Mt/TWh) | CCS_2 Ret<br>(TWh/y) | SOLID_2<br>(TWh/y) | GAS_2<br>(TWh/y) | Net Energy<br>(TWh/y) | CO <sub>2</sub> Load<br>(Mt/y) | Total Cost<br>(mil USD/y) |
|---------|-------------------------|---------------------------------------|----------------------|--------------------|------------------|-----------------------|--------------------------------|---------------------------|
| SOLAR   | 26.7                    | 0.15                                  | 0                    | 0                  | 0                | 26.7                  | 4                              |                           |
| SOLAR   | 0                       | 0.15                                  | 0                    | 0                  | 0                | 0                     | 0                              |                           |
| NG      | 20.5                    | 0.5                                   | 6.5                  | 0                  | 14               | 19.13                 | 3.39                           |                           |
| NG      | 0                       | 0.5                                   | 0                    | 0                  | 0                | 0                     | 0                              |                           |
| NG      | 9.94                    | 0.5                                   | 9.94                 | 0                  | 0                | 7.85                  | 1.54                           |                           |
| OIL     | 0                       | 0.8                                   | 0                    | 0                  | 0                | 0                     | 0                              |                           |
| COAL    | 0                       | 1                                     | 0                    | 0                  | 0                | 0                     | 0                              |                           |
| COAL    | 18.1                    | 1                                     | 0                    | 18.1               | 0                | 18.1                  | 5.79                           |                           |
| SOLAR   | 20                      | 0.15                                  | 0                    | 0                  | 0                | 20                    | 3                              |                           |
| SOLAR   | 24.76                   | 0.15                                  | 0                    | 0                  | 0                | 24.76                 | 3.71                           |                           |
| SOLAR   |                         | 0.06                                  |                      |                    |                  | 3.45                  | 0.21                           |                           |
| HYDRO   |                         | 0.11                                  |                      |                    |                  | 0                     | 0                              |                           |
| BIOMASS |                         | 0.22                                  |                      |                    |                  | 0                     | 0                              |                           |
| BIOGAS  |                         | 0.17                                  |                      |                    |                  | 0                     | 0                              |                           |
| MSW     |                         | 0.26                                  |                      |                    |                  | 0                     | 0                              |                           |
|         |                         |                                       |                      |                    |                  |                       | <b>21.65</b>                   | <b>4051.18</b>            |

(e)

|          | Fuel    | Gross Energy (TWh/y) | CO <sub>2</sub> Intensity (Mt/TWh) | CCS_2 Ret (TWh/y) | SOLID_2 (TWh/y) | GAS_2 (TWh/y) | Net Energy (TWh/y) | CO <sub>2</sub> Load (Mt/y) | Total Cost (mil USD/y) |
|----------|---------|----------------------|------------------------------------|-------------------|-----------------|---------------|--------------------|-----------------------------|------------------------|
| Plant_1  | SOLAR   | 26.7                 | 0.15                               | 0                 | 0               | 0             | 26.7               | 4                           |                        |
| Plant_2  | SOLAR   | 0                    | 0.15                               | 0                 | 0               | 0             | 0                  | 0                           |                        |
| Plant_3  | NG      | 20.5                 | 0.5                                | 6.5               | 0               | 14            | 19.2               | 3.08                        |                        |
| Plant_4  | NG      | 7.9                  | 0.5                                | 0.82              | 0               | 7.08          | 7.74               | 1.19                        |                        |
| Plant_5  | NG      | 16.8                 | 0.5                                | 9.94              | 0               | 6.86          | 14.81              | 2.52                        |                        |
| Plant_6  | OIL     | 0                    | 0.8                                | 0                 | 0               | 0             | 0                  | 0                           |                        |
| Plant_7  | COAL    | 0                    | 1                                  | 0                 | 0               | 0             | 0                  | 0                           |                        |
| Plant_8  | COAL    | 18.1                 | 1                                  | 0                 | 18.1            | 0             | 18.1               | 5.43                        |                        |
| Plant_9  | SOLAR   | 20                   | 0.15                               | 0                 | 0               | 0             | 20                 | 3                           |                        |
| Plant_10 | SOLAR   | 25                   | 0.15                               | 0                 | 0               | 0             | 25                 | 3.75                        |                        |
| SOLAR    | SOLAR   |                      | 0.05                               |                   |                 |               | 3.45               | 0.17                        |                        |
| HYDRO    | HYDRO   |                      | 0.1                                |                   |                 |               | 0                  | 0                           |                        |
| BIOMASS  | BIOMASS |                      | 0.2                                |                   |                 |               | 0                  | 0                           |                        |
| BIOGAS   | BIOGAS  |                      | 0.15                               |                   |                 |               | 0                  | 0                           |                        |
| MSW      | MSW     |                      | 0.25                               |                   |                 |               | 0                  | 0                           |                        |
| TOTAL    |         |                      |                                    |                   |                 |               |                    | 23.14                       | 4098.1                 |

(f)

Table S2: Results for Case 1 in Scenario 2: (a) Period 1, (b) Period 2, (c) Period 3, (d) Period 4, (e) Period 5 and (f) Period 6

|          | Fuel    | Gross Energy (TWh/y) | CO <sub>2</sub> Intensity (Mt/TWh) | Net Energy (TWh/y) | CO <sub>2</sub> Load (Mt/y) | Total Cost (mil USD/y) |
|----------|---------|----------------------|------------------------------------|--------------------|-----------------------------|------------------------|
| Plant_1  | SOLAR   | 20.02                | 0.15                               | 20.02              | 3                           |                        |
| Plant_2  | SOLAR   | 0                    | 0.15                               | 0                  | 0                           |                        |
| Plant_3  | NG      | 15.33                | 0.5                                | 15.33              | 7.67                        |                        |
| Plant_4  | NG      | 0                    | 0.5                                | 0                  | 0                           |                        |
| Plant_5  | NG      | 0                    | 0.5                                | 0                  | 0                           |                        |
| Plant_6  | OIL     | 0                    | 0.8                                | 0                  | 0                           |                        |
| Plant_7  | COAL    | 6.68                 | 1                                  | 6.68               | 6.68                        |                        |
| Plant_8  | COAL    | 17.97                | 1                                  | 17.97              | 17.97                       |                        |
| Plant_9  | SOLAR   | 0                    | 0.15                               | 0                  | 0                           |                        |
| Plant_10 | SOLAR   | 0                    | 0.15                               | 0                  | 0                           |                        |
| SOLAR    | SOLAR   |                      | 0.1                                | 0                  | 0                           |                        |
| HYDRO    | HYDRO   |                      | 0.15                               | 0                  | 0                           |                        |
| BIOMASS  | BIOMASS |                      | 0.3                                | 0                  | 0                           |                        |
| BIOGAS   | BIOGAS  |                      | 0.25                               | 0                  | 0                           |                        |
| TOTAL    |         |                      |                                    |                    | 35.31                       | 3000                   |

(a)

|          | Fuel    | Gross Energy<br>(TWh/y) | CO <sub>2</sub> Intensity<br>(Mt/TWh) | SOLID_2<br>(TWh/y) | GAS_2<br>(TWh/y) | Net Energy<br>(TWh/y) | CO <sub>2</sub> Load<br>(Mt/y) | Total Cost<br>(mil USD/y) |
|----------|---------|-------------------------|---------------------------------------|--------------------|------------------|-----------------------|--------------------------------|---------------------------|
| Plant_1  | SOLAR   | 26.18                   | 0.15                                  | 0                  | 0                | 26.18                 | 3.93                           |                           |
| Plant_2  | SOLAR   | 0                       | 0.15                                  | 0                  | 0                | 0                     | 0                              |                           |
| Plant_3  | NG      | 20.5                    | 0.5                                   | 0                  | 0                | 20.5                  | 10.25                          |                           |
| Plant_4  | NG      | 0                       | 0.5                                   | 0                  | 0                | 0                     | 0                              |                           |
| Plant_5  | NG      | 0                       | 0.5                                   | 0                  | 0                | 0                     | 0                              |                           |
| Plant_6  | OIL     | 0                       | 0.8                                   | 0                  | 0                | 0                     | 0                              |                           |
| Plant_7  | COAL    | 10.22                   | 1                                     | 0                  | 0                | 10.22                 | 10.22                          |                           |
| Plant_8  | COAL    | 18.1                    | 1                                     | 0                  | 0                | 18.1                  | 18.1                           |                           |
| Plant_9  | SOLAR   | 0                       | 0.15                                  | 0                  | 0                | 0                     | 0                              |                           |
| Plant_10 | SOLAR   | 0                       | 0.15                                  | 0                  | 0                | 0                     | 0                              |                           |
| SOLAR    | SOLAR   |                         | 0.09                                  |                    |                  | 0                     | 0                              |                           |
| HYDRO    | HYDRO   |                         | 0.14                                  |                    |                  | 0                     | 0                              |                           |
| BIOMASS  | BIOMASS |                         | 0.28                                  |                    |                  | 0                     | 0                              |                           |
| BIOGAS   | BIOGAS  |                         | 0.23                                  |                    |                  | 0                     | 0                              |                           |
| MSW      | MSW     |                         | 0.29                                  |                    |                  | 0                     | 0                              |                           |
| TOTAL    |         |                         |                                       |                    |                  |                       | 42.5                           | 3500                      |

(b)



|          | Fuel     | Gross Energy (TWh/y) | CO <sub>2</sub> Intensity (Mt/TWh ) | CCS_2 Ret (TWh/y) | SOLID_1 (TWh/y) | SOLID_2 (TWh/y) | GAS_1 (TWh/y) | GAS_2 (TWh/y) | Net Energy (TWh/y) | CO <sub>2</sub> Load (Mt/y) | Total Cost (mil USD/y) |
|----------|----------|----------------------|-------------------------------------|-------------------|-----------------|-----------------|---------------|---------------|--------------------|-----------------------------|------------------------|
| Plant_1  | SOLAR    | 26.18                | 0.15                                | 0                 | 0               | 0               | 0             | 0             | 26.18              | 3.93                        |                        |
| Plant_2  | SOLAR    | 0                    | 0.15                                | 0                 | 0               | 0               | 0             | 0             | 0                  | 0                           |                        |
| Plant_3  | NG       | 20.5                 | 0.5                                 | 0                 | 0               | 0               | 0             | 0             | 20.5               | 10.25                       |                        |
| Plant_4  | NG       | 0                    | 0.5                                 | 0                 | 0               | 0               | 0             | 0             | 0                  | 0                           |                        |
| Plant_5  | NG       | 0                    | 0.5                                 | 0                 | 0               | 0               | 0             | 0             | 0                  | 0                           |                        |
| Plant_6  | OIL      | 0                    | 0.8                                 | 0                 | 0               | 0               | 0             | 0             | 0                  | 0                           |                        |
| Plant_7  | COAL     | 10.22                | 1                                   | 0                 | 0               | 0               | 0             | 0             | 10.22              | 10.22                       |                        |
| Plant_8  | COAL     | 18.1                 | 1                                   | 0                 | 18.1            | 0               | 0             | 0             | 18.1               | 3.26                        |                        |
| Plant_9  | SOLAR    | 15                   | 0.15                                | 0                 | 0               | 0               | 0             | 0             | 15                 | 2.25                        |                        |
| Plant_10 | SOLAR    | 0                    | 0.15                                | 0                 | 0               | 0               | 0             | 0             | 0                  | 0                           |                        |
| EP_NET_3 | EP_NET_3 |                      | -0.42                               |                   |                 |                 |               |               | 0                  | 0                           |                        |
| EC_NET_3 | EC_NET_3 |                      | -0.22                               |                   |                 |                 |               |               | 0                  | 0                           |                        |
| SOLAR    | SOLAR    |                      | 0.08                                |                   |                 |                 |               |               | 0                  | 0                           |                        |
| HYDRO    | HYDRO    |                      | 0.13                                |                   |                 |                 |               |               | 0                  | 0                           |                        |
| BIOMAS S | BIOMASS  |                      | 0.26                                |                   |                 |                 |               |               | 0                  | 0                           |                        |
| BIOGAS   | BIOGAS   |                      | 0.21                                |                   |                 |                 |               |               | 0                  | 0                           |                        |
| MSW      | MSW      |                      | 0.28                                |                   |                 |                 |               |               | 0                  | 0                           |                        |
| TOTAL    |          |                      |                                     |                   |                 |                 |               |               |                    | 29.91                       | 3979.32                |

(c)

|          | Fuel     | Gross Energy (TWh/y) | CO <sub>2</sub> Intensity (Mt/TWh) | CCS_1 Ret (TWh/y) | CCS_2 Ret (TWh/y) | SOLID_1 (TWh/y) | SOLID_2 (TWh/y) | GAS_1 (TWh/y) | GAS_2 (TWh/y) | Net Energy (TWh/y) | CO <sub>2</sub> Load (Mt/y) | Total Cost (mil USD/y) |
|----------|----------|----------------------|------------------------------------|-------------------|-------------------|-----------------|-----------------|---------------|---------------|--------------------|-----------------------------|------------------------|
| Plant_1  | SOLAR    | 26.69                | 0.15                               | 0                 | 0                 | 0               | 0               | 0             | 0             | 26.69              | 4                           |                        |
| Plant_2  | SOLAR    | 0                    | 0.15                               | 0                 | 0                 | 0               | 0               | 0             | 0             | 0                  | 0                           |                        |
| Plant_3  | NG       | 20.5                 | 0.5                                | 0                 | 20.5              | 0               | 0               | 0             | 0             | 15.99              | 3.28                        |                        |
| Plant_4  | NG       | 0                    | 0.5                                | 0                 | 0                 | 0               | 0               | 0             | 0             | 0                  | 0                           |                        |
| Plant_5  | NG       | 9.49                 | 0.5                                | 0                 | 9.49              | 0               | 0               | 0             | 0             | 7.4                | 1.52                        |                        |
| Plant_6  | OIL      | 0                    | 0.8                                | 0                 | 0                 | 0               | 0               | 0             | 0             | 0                  | 0                           |                        |
| Plant_7  | COAL     | 10.22                | 1                                  | 0                 | 0                 | 0               | 0               | 0             | 0             | 10.22              | 10.22                       |                        |
| Plant_8  | COAL     | 18.1                 | 1                                  | 0                 | 0                 | 18.1            | 0               | 0             | 0             | 18.1               | 3.08                        |                        |
| Plant_9  | SOLAR    | 20                   | 0.15                               | 0                 | 0                 | 0               | 0               | 0             | 0             | 20                 | 3                           |                        |
| Plant_10 | SOLAR    | 0                    | 0.15                               | 0                 | 0                 | 0               | 0               | 0             | 0             | 0                  | 0                           |                        |
| EP_NET_2 | EP_NET_2 |                      | -0.63                              |                   |                   |                 |                 |               |               | 0                  | -4.16                       |                        |
| EP_NET_3 | EP_NET_3 |                      | -0.43                              |                   |                   |                 |                 |               |               | 0                  | 0                           |                        |
| EC_NET_2 | EC_NET_2 |                      | -0.43                              |                   |                   |                 |                 |               |               | 0                  | 0                           |                        |
| EC_NET_3 | EC_NET_3 |                      | -0.23                              |                   |                   |                 |                 |               |               | 0                  | 0                           |                        |
| SOLAR    | SOLAR    |                      | 0.07                               |                   |                   |                 |                 |               |               | 0                  | 0                           |                        |
| HYDRO    | HYDRO    |                      | 0.12                               |                   |                   |                 |                 |               |               | 0                  | 0                           |                        |
| BIOMASS  | BIOMASS  |                      | 0.24                               |                   |                   |                 |                 |               |               | 0                  | 0                           |                        |
| BIOGAS   | BIOGAS   |                      | 0.19                               |                   |                   |                 |                 |               |               | 0                  | 0                           |                        |
| MSW      | MSW      |                      | 0.27                               |                   |                   |                 |                 |               |               | 0                  | 0                           |                        |
| TOTAL    |          |                      |                                    |                   |                   |                 |                 |               |               |                    | 20.95                       | 4500                   |

(d)





|                      |              |  |       |  |  |  |  |  |  |   |            |             |
|----------------------|--------------|--|-------|--|--|--|--|--|--|---|------------|-------------|
| <b>EC_NET<br/>_3</b> | EC_NET<br>_3 |  | -0.25 |  |  |  |  |  |  | 0 | 0          |             |
| <b>SOLAR</b>         | SOLAR        |  | 0.05  |  |  |  |  |  |  | 0 | 0          |             |
| <b>HYDRO</b>         | HYDRO        |  | 0.1   |  |  |  |  |  |  | 0 | 0          |             |
| <b>BIOMAS<br/>S</b>  | BIOMAS<br>S  |  | 0.2   |  |  |  |  |  |  | 0 | 0          |             |
| <b>BIOGAS</b>        | BIOGAS       |  | 0.15  |  |  |  |  |  |  | 0 | 0          |             |
| <b>MSW</b>           | MSW          |  | 0.25  |  |  |  |  |  |  | 0 | 0          |             |
| <b>TOTAL</b>         |              |  |       |  |  |  |  |  |  |   | <b>1.2</b> | <b>5500</b> |

(f)

**Table S3: Results for Case 2 in Scenario 2: (a) Period 1, (b) Period 2, (c) Period 3, (d) Period 4, (e) Period 5 and (f) Period 6**

|                 | Fuel    | Gross Energy<br>(TWh/y) | CO <sub>2</sub> Intensity<br>(Mt/TWh) | Net Energy<br>(TWh/y) | CO <sub>2</sub> Load (Mt/y) | Total Cost (mil<br>USD/y) |
|-----------------|---------|-------------------------|---------------------------------------|-----------------------|-----------------------------|---------------------------|
| <b>Plant_1</b>  | SOLAR   | 26.7                    | 0.15                                  | 26.7                  | 4                           |                           |
| <b>Plant_2</b>  | SOLAR   | 21.3                    | 0.15                                  | 21.3                  | 3.19                        |                           |
| <b>Plant_3</b>  | NG      | 0                       | 0.5                                   | 0                     | 0                           |                           |
| <b>Plant_4</b>  | NG      | 0                       | 0.5                                   | 0                     | 0                           |                           |
| <b>Plant_5</b>  | NG      | 6.9                     | 0.5                                   | 6.9                   | 3.45                        |                           |
| <b>Plant_6</b>  | OIL     | 0                       | 0.8                                   | 0                     | 0                           |                           |
| <b>Plant_7</b>  | COAL    | 0                       | 1                                     | 0                     | 0                           |                           |
| <b>Plant_8</b>  | COAL    | 5.1                     | 1                                     | 5.1                   | 5.1                         |                           |
| <b>Plant_9</b>  | SOLAR   | 0                       | 0.15                                  | 0                     | 0                           |                           |
| <b>Plant_10</b> | SOLAR   | 0                       | 0.15                                  | 0                     | 0                           |                           |
| <b>SOLAR</b>    | SOLAR   |                         | 0.1                                   | 0                     | 0                           |                           |
| <b>HYDRO</b>    | HYDRO   |                         | 0.15                                  | 0                     | 0                           |                           |
| <b>BIOMASS</b>  | BIOMASS |                         | 0.3                                   | 0                     | 0                           |                           |
| <b>BIOGAS</b>   | BIOGAS  |                         | 0.25                                  | 0                     | 0                           |                           |
| <b>TOTAL</b>    |         |                         |                                       |                       | <b>15.75</b>                | <b>3673.7</b>             |

(a)

|          | Fuel    | Gross Energy<br>(TWh/y) | CO <sub>2</sub> Intensity<br>(Mt/TWh) | SOLID_2<br>(TWh/y) | GAS_2<br>(TWh/y) | Net Energy<br>(TWh/y) | CO <sub>2</sub> Load<br>(Mt/y) | Total Cost<br>(mil USD/y) |
|----------|---------|-------------------------|---------------------------------------|--------------------|------------------|-----------------------|--------------------------------|---------------------------|
| Plant_1  | SOLAR   | 26.7                    | 0.15                                  | 0                  | 0                | 26.7                  | 4                              |                           |
| Plant_2  | SOLAR   | 21.3                    | 0.15                                  | 0                  | 0                | 21.3                  | 3.19                           |                           |
| Plant_3  | NG      | 0                       | 0.5                                   | 0                  | 0                | 0                     | 0                              |                           |
| Plant_4  | NG      | 0                       | 0.5                                   | 0                  | 0                | 0                     | 0                              |                           |
| Plant_5  | NG      | 6.9                     | 0.5                                   | 0                  | 0                | 6.9                   | 3.45                           |                           |
| Plant_6  | OIL     | 0                       | 0.8                                   | 0                  | 0                | 0                     | 0                              |                           |
| Plant_7  | COAL    | 0                       | 1                                     | 0                  | 0                | 0                     | 0                              |                           |
| Plant_8  | COAL    | 5.1                     | 1                                     | 0                  | 0                | 5.1                   | 5.1                            |                           |
| Plant_9  | SOLAR   | 15                      | 0.15                                  | 0                  | 0                | 15                    | 2.25                           |                           |
| Plant_10 | SOLAR   | 0                       | 0.15                                  | 0                  | 0                | 0                     | 0                              |                           |
| SOLAR    | SOLAR   |                         | 0.09                                  |                    |                  | 0                     | 0                              |                           |
| HYDRO    | HYDRO   |                         | 0.14                                  |                    |                  | 0                     | 0                              |                           |
| BIOMASS  | BIOMASS |                         | 0.28                                  |                    |                  | 0                     | 0                              |                           |
| BIOGAS   | BIOGAS  |                         | 0.23                                  |                    |                  | 0                     | 0                              |                           |
| MSW      | MSW     |                         | 0.29                                  |                    |                  | 0                     | 0                              |                           |
| TOTAL    |         |                         |                                       |                    |                  |                       | 18                             | 4119.7                    |

(b)

|          | Fuel     | Gross Energy (TWh/y) | CO <sub>2</sub> Intensity (Mt/TWh ) | CCS_2 Ret (TWh/y) | SOLID_1 (TWh/y) | SOLID_2 (TWh/y) | GAS_1 (TWh/y) | GAS_2 (TWh/y) | Net Energy (TWh/y) | CO <sub>2</sub> Load (Mt/y) | Total Cost (mil USD/y) |
|----------|----------|----------------------|-------------------------------------|-------------------|-----------------|-----------------|---------------|---------------|--------------------|-----------------------------|------------------------|
| Plant_1  | SOLAR    | 26.7                 | 0.15                                | 0                 | 0               | 0               | 0             | 0             | 26.7               | 4                           |                        |
| Plant_2  | SOLAR    | 21.3                 | 0.15                                | 0                 | 0               | 0               | 0             | 0             | 21.3               | 3.19                        |                        |
| Plant_3  | NG       | 0                    | 0.5                                 | 0                 | 0               | 0               | 0             | 0             | 0                  | 0                           |                        |
| Plant_4  | NG       | 0                    | 0.5                                 | 0                 | 0               | 0               | 0             | 0             | 0                  | 0                           |                        |
| Plant_5  | NG       | 6.9                  | 0.5                                 | 0                 | 0               | 0               | 3.94          | 0             | 6.9                | 1.99                        |                        |
| Plant_6  | OIL      | 0                    | 0.8                                 | 0                 | 0               | 0               | 0             | 0             | 0                  | 0                           |                        |
| Plant_7  | COAL     | 0                    | 1                                   | 0                 | 0               | 0               | 0             | 0             | 0                  | 0                           |                        |
| Plant_8  | COAL     | 18.1                 | 1                                   | 0                 | 18.1            | 0               | 0             | 0             | 18.1               | 3.26                        |                        |
| Plant_9  | SOLAR    | 17                   | 0.15                                | 0                 | 0               | 0               | 0             | 0             | 17                 | 2.55                        |                        |
| Plant_10 | SOLAR    | 0                    | 0.15                                | 0                 | 0               | 0               | 0             | 0             | 0                  | 0                           |                        |
| EP_NET_3 | EP_NET_3 |                      | -0.42                               |                   |                 |                 |               |               | 0                  | 0                           |                        |
| EC_NET_3 | EC_NET_3 |                      | -0.22                               |                   |                 |                 |               |               | 0                  | 0                           |                        |
| SOLAR    | SOLAR    |                      | 0.08                                |                   |                 |                 |               |               | 0                  | 0                           |                        |
| HYDRO    | HYDRO    |                      | 0.13                                |                   |                 |                 |               |               | 0                  | 0                           |                        |
| BIOMAS S | BIOMASS  |                      | 0.26                                |                   |                 |                 |               |               | 0                  | 0                           |                        |
| BIOGAS   | BIOGAS   |                      | 0.21                                |                   |                 |                 |               |               | 0                  | 0                           |                        |
| MSW      | MSW      |                      | 0.28                                |                   |                 |                 |               |               | 0                  | 0                           |                        |
| TOTAL    |          |                      |                                     |                   |                 |                 |               |               |                    | 15                          | 4056.82                |

(c)



|          | Fuel     | Gross Energy (TWh/y) | CO <sub>2</sub> Intensity (Mt/TWh) | CCS_1 Ret (TWh/y) | CCS_2 Ret (TWh/y) | SOLID_1 (TWh/y) | SOLID_2 (TWh/y) | GAS_1 (TWh/y) | GAS_2 (TWh/y) | Net Energy (TWh/y) | CO <sub>2</sub> Load (Mt/y) | Total Cost (mil USD/y) |
|----------|----------|----------------------|------------------------------------|-------------------|-------------------|-----------------|-----------------|---------------|---------------|--------------------|-----------------------------|------------------------|
| Plant_1  | SOLAR    | 26.7                 | 0.15                               | 0                 | 0                 | 0               | 0               | 0             | 0             | 26.7               | 4                           |                        |
| Plant_2  | SOLAR    | 21.3                 | 0.15                               | 0                 | 0                 | 0               | 0               | 0             | 0             | 21.3               | 3.19                        |                        |
| Plant_3  | NG       | 0                    | 0.5                                | 0                 | 0                 | 0               | 0               | 0             | 0             | 0                  | 0                           |                        |
| Plant_4  | NG       | 0                    | 0.5                                | 0                 | 0                 | 0               | 0               | 0             | 0             | 0                  | 0                           |                        |
| Plant_5  | NG       | 12.22                | 0.5                                | 0                 | 0                 | 0               | 0               | 12.22         | 0             | 12.22              | 1.47                        |                        |
| Plant_6  | OIL      | 0                    | 0.8                                | 0                 | 0                 | 0               | 0               | 0             | 0             | 0                  | 0                           |                        |
| Plant_7  | COAL     | 6.67                 | 1                                  | 0                 | 0                 | 0               | 0               | 0             | 0             | 6.67               | 6.67                        |                        |
| Plant_8  | COAL     | 18.1                 | 1                                  | 0                 | 0                 | 18.1            | 0               | 0             | 0             | 18.1               | 3.08                        |                        |
| Plant_9  | SOLAR    | 20                   | 0.15                               | 0                 | 0                 | 0               | 0               | 0             | 0             | 20                 | 3                           |                        |
| Plant_10 | SOLAR    | 0                    | 0.15                               | 0                 | 0                 | 0               | 0               | 0             | 0             | 0                  | 0                           |                        |
| EP_NET_2 | EP_NET_2 |                      | -0.63                              |                   |                   |                 |                 |               |               | 9.83               | -6.19                       |                        |
| EP_NET_3 | EP_NET_3 |                      | -0.43                              |                   |                   |                 |                 |               |               | 0                  | 0                           |                        |
| EC_NET_2 | EC_NET_2 |                      | -0.43                              |                   |                   |                 |                 |               |               | 9.83               | -4.23                       |                        |
| EC_NET_3 | EC_NET_3 |                      | -0.23                              |                   |                   |                 |                 |               |               | 0                  | 0                           |                        |
| SOLAR    | SOLAR    |                      | 0.07                               |                   |                   |                 |                 |               |               | 0                  | 0                           |                        |
| HYDRO    | HYDRO    |                      | 0.12                               |                   |                   |                 |                 |               |               | 0                  | 0                           |                        |
| BIOMASS  | BIOMASS  |                      | 0.24                               |                   |                   |                 |                 |               |               | 0                  | 0                           |                        |
| BIOGAS   | BIOGAS   |                      | 0.19                               |                   |                   |                 |                 |               |               | 0                  | 0                           |                        |
| MSW      | MSW      |                      | 0.27                               |                   |                   |                 |                 |               |               | 0                  | 0                           |                        |
| TOTAL    |          |                      |                                    |                   |                   |                 |                 |               |               |                    | 11                          | 5118                   |

(d)



|               |        |  |      |  |  |  |  |  |  |   |          |                |
|---------------|--------|--|------|--|--|--|--|--|--|---|----------|----------------|
| <b>BIOGAS</b> | BIOGAS |  | 0.17 |  |  |  |  |  |  | 0 | 0        |                |
| <b>MSW</b>    | MSW    |  | 0.26 |  |  |  |  |  |  | 0 | 0        |                |
| <b>TOTAL</b>  |        |  |      |  |  |  |  |  |  |   | <b>6</b> | <b>4618.86</b> |

(e)

|          | Fuel     | Gross Energy (TWh/y) | CO <sub>2</sub> Intensity (Mt/TWh) | CCS_1 Ret (TWh/y) | CCS_2 Ret (TWh/y) | SOLID_1 (TWh/y) | SOLID_2 (TWh/y) | GAS_1 (TWh/y) | GAS_2 (TWh/y) | Net Energy (TWh/y) | CO <sub>2</sub> Load (Mt/y) | Total Cost (mil USD/y) |
|----------|----------|----------------------|------------------------------------|-------------------|-------------------|-----------------|-----------------|---------------|---------------|--------------------|-----------------------------|------------------------|
| Plant_1  | SOLAR    | 26.7                 | 0.15                               | 0                 | 0                 | 0               | 0               | 0             | 0             | 26.7               | 4                           |                        |
| Plant_2  | SOLAR    | 21.3                 | 0.15                               | 0                 | 0                 | 0               | 0               | 0             | 0             | 21.3               | 3.19                        |                        |
| Plant_3  | NG       | 0                    | 0.5                                | 0                 | 0                 | 0               | 0               | 0             | 0             | 0                  | 0                           |                        |
| Plant_4  | NG       | 11.68                | 0.5                                | 0                 | 11.68             | 0               | 0               | 0             | 0             | 9.34               | 1.75                        |                        |
| Plant_5  | NG       | 12.22                | 0.5                                | 0                 | 0                 | 0               | 0               | 12.22         | 0             | 12.22              | 1.22                        |                        |
| Plant_6  | OIL      | 0                    | 0.8                                | 0                 | 0                 | 0               | 0               | 0             | 0             | 0                  | 0                           |                        |
| Plant_7  | COAL     | 0                    | 1                                  | 0                 | 0                 | 0               | 0               | 0             | 0             | 0                  | 0                           |                        |
| Plant_8  | COAL     | 18.1                 | 1                                  | 0                 | 0                 | 18.1            | 0               | 0             | 0             | 18.1               | 2.72                        |                        |
| Plant_9  | SOLAR    | 20                   | 0.15                               | 0                 | 0                 | 0               | 0               | 0             | 0             | 20                 | 3                           |                        |
| Plant_10 | SOLAR    | 25                   | 0.15                               | 0                 | 0                 | 0               | 0               | 0             | 0             | 25                 | 3.75                        |                        |
| EP_NET_1 | EP_NET_1 |                      | -0.85                              |                   |                   |                 |                 |               |               | 6.75               | -5.74                       |                        |
| EP_NET_2 | EP_NET_2 |                      | -0.65                              |                   |                   |                 |                 |               |               | 10.83              | -7.04                       |                        |
| EP_NET_3 | EP_NET_3 |                      | -0.45                              |                   |                   |                 |                 |               |               | 0                  | 0                           |                        |
| EC_NET_1 | EC_NET_1 |                      | -0.65                              |                   |                   |                 |                 |               |               | 0                  | 0                           |                        |
| EC_NET_2 | EC_NET_2 |                      | -0.45                              |                   |                   |                 |                 |               |               | 15.25              | -6.86                       |                        |

|                      |              |  |       |  |  |  |  |  |  |   |          |               |
|----------------------|--------------|--|-------|--|--|--|--|--|--|---|----------|---------------|
| <b>EC_NET<br/>_3</b> | EC_NET<br>_3 |  | -0.25 |  |  |  |  |  |  | 0 | 0        |               |
| <b>SOLAR</b>         | SOLAR        |  | 0.05  |  |  |  |  |  |  | 0 | 0        |               |
| <b>HYDRO</b>         | HYDRO        |  | 0.1   |  |  |  |  |  |  | 0 | 0        |               |
| <b>BIOMAS<br/>S</b>  | BIOMAS<br>S  |  | 0.2   |  |  |  |  |  |  | 0 | 0        |               |
| <b>BIOGAS</b>        | BIOGAS       |  | 0.15  |  |  |  |  |  |  | 0 | 0        |               |
| <b>MSW</b>           | MSW          |  | 0.25  |  |  |  |  |  |  | 0 | 0        |               |
| <b>TOTAL</b>         |              |  |       |  |  |  |  |  |  |   | <b>0</b> | <b>5064.7</b> |

(f)
